# Supplementary material for: Molecular residual disease and efficacy of adjuvant chemotherapy in patients with colorectal cancer
Source: Springer Nature journal article supplement (doi:10.1038/s41591-022-02115-4), 2023-01-01
Supplement: MOESM1 [file 41591_2022_2115_MOESM1_ESM.pdf]

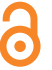

---

# Molecular residual disease and efficacy of adjuvant chemotherapy in patients with colorectal cancer

---

In the format provided by the authors and unedited

---

# **Molecular Residual Disease and Efficacy of Adjuvant Chemotherapy in Patients with Clinical Stage II-IV Colorectal Cancer**

Daisuke Kotani<sup>†,1</sup>, Eiji Oki<sup>†,2</sup>, Yoshiaki Nakamura<sup>†1,3</sup>, Hiroki Yukami<sup>1,4</sup>, Saori Mishima<sup>1</sup>, Hideaki Bando<sup>1,3</sup>, Hiromichi Shirasu<sup>5</sup>, Kentaro Yamazaki<sup>5</sup>, Jun Watanabe<sup>6</sup>, Masahito Kotaka<sup>7</sup>, Keiji Hirata<sup>8</sup>, Naoya Akazawa<sup>9</sup>, Kozo Kataoka<sup>10</sup>, Shruti Sharma<sup>11</sup>, Vasily N. Aushev<sup>11</sup>, Alexey Aleshin<sup>11</sup>, Toshihiro Misumi<sup>12</sup>, Hiroya Taniguchi<sup>13</sup>, Ichiro Takemasa<sup>14</sup>, Takeshi Kato<sup>15</sup>, Masaki Mori<sup>16</sup>, Takayuki Yoshino<sup>1</sup>

## **Affiliations**

1. Department of Gastroenterology and Gastrointestinal Oncology, National Cancer Center Hospital East, Kashiwa, Japan
2. Department of Surgery and Science, Graduate School of Medical Science, Kyushu University, Fukuoka, Japan
3. Translational Research Support Section, National Cancer Center Hospital East, Kashiwa, Japan
4. The Second Department of Internal Medicine Center, Osaka Medical and Pharmaceutical University, Takatsuki, Japan.
5. Division of Gastrointestinal Oncology, Shizuoka Cancer Center, Sunto-gun, Japan
6. Department of Surgery, Gastroenterological Center, Yokohama City University Medical Center, Yokohama, Japan
7. Gastrointestinal Cancer Center, Sano Hospital, Kobe, Japan
8. Department of Surgery 1, School of Medicine, University of Occupational and Environmental Health, Kitakyushu, Japan

9. Department of Gastroenterological Surgery, Sendai City Medical Center Sendai Open Hospital, Sendai, Japan
10. Division of Lower GI Surgery, Department of Surgery, Hyogo College of Medicine, Hyogo, Japan.
11. Natera, Inc., Austin, TX, U.S.A.
12. Department of Data Science, National Cancer Center Hospital East, Kashiwa, Japan
13. Department of Clinical Oncology, Aichi Cancer Center, Nagoya, Japan
14. Department of Surgery, Surgical Oncology and Science, Sapporo Medical University, Sapporo, Japan
15. Department of Surgery, National Hospital Organization Osaka National Hospital, Osaka, Japan
16. Tokai University School of Medicine, Isehara, Japan

† These authors contributed equally to this work.

### **Corresponding author**

Eiji Oki

Department of Surgery and Science, Graduate School of Medical Science, Kyushu University, Fukuoka, Japan

**Email:** [oki.eiji.857@m.kyushu-u.ac.jp](mailto:oki.eiji.857@m.kyushu-u.ac.jp)

# Supplementary Tables

**Supplementary Table 1. Baseline characteristics of high-risk stage II and III patients with post-surgical ctDNA negative result (4-week) further stratified by ACT status**

| High-risk stage II-III patients with postsurgical ctDNA-negative status |                    | Adjuvant chemotherapy<br>N= 219 (%) | No-Adjuvant<br>Chemotherapy<br>(Observation)<br>N=312 (%) | P-value** |
|-------------------------------------------------------------------------|--------------------|-------------------------------------|-----------------------------------------------------------|-----------|
| Age                                                                     | Median (range)     | 66 (25-89)                          | 71 (44-93)                                                | -         |
|                                                                         | < 70 years old     | 152 (69.4)                          | 142 (45.5)                                                | 0.0001    |
|                                                                         | >70 years old      | 67 (30.6)                           | 170 (54.5)                                                |           |
| Sex                                                                     | Male               | 109 (49.8)                          | 156 (50)                                                  | 0.96      |
|                                                                         | Female             | 110 (50.2)                          | 156 (50)                                                  |           |
| ECOG PS                                                                 | 0                  | 200 (91.3)                          | 254 (81.4)                                                | 0.001     |
|                                                                         | 1                  | 19 (8.7)                            | 58 (18.6)                                                 |           |
| Primary location                                                        | Right-sided colon  | 90 (41.1)                           | 145 (46.5)                                                | 0.35      |
|                                                                         | Left-sided colon   | 121 (55.3)                          | 160 (51.3)                                                |           |
|                                                                         | Rectum             | 8 (3.6)                             | 7 (2.2)                                                   |           |
| Pathological T stage                                                    | T1-2               | 9 (4.1)                             | 8 (2.6)                                                   | 0.31      |
|                                                                         | T3-4               | 210 (95.9)                          | 304 (97.4)                                                |           |
| Pathological N stage                                                    | N0                 | 39 (17.8)                           | 194 (62.2)                                                | 0.0001    |
|                                                                         | N1-2               | 180 (82.2)                          | 118 (37.8)                                                |           |
| Pathological stage                                                      | High risk Stage II | 38 (17.3)                           | 187 (60)                                                  | 0.0001    |
|                                                                         | Stage III          | 181 (82.7)                          | 125 (40)                                                  |           |

|                 |                    |            |            |      |
|-----------------|--------------------|------------|------------|------|
| RAS/BRAF status | RAS/BRAF wild-type | 108 (49.3) | 149 (48.1) | 0.95 |
|                 | RAS mutant         | 87 (39.7)  | 125 (40.3) |      |
|                 | BRAF mutant        | 24 (11)    | 36 (11.6)  |      |
| MSI status      | MSI-High           | 21 (9.6)   | 52 (16.7)  | 0.01 |
|                 | MSS                | 198 (90.4) | 260 (83.3) |      |

\*\*The p-values are calculated using the two-sided chi-square test that compares the distribution of the factors between the two columns (ACT vs Observation) with no correction for multiplicity.

**Supplementary Table 2. Baseline characteristics of high-risk stage II and III patients with post-surgical ctDNA positive result (4-week) further stratified by ACT status**

| High-risk stage II-III patients with postsurgical ctDNA-positive status |                   | Adjuvant chemotherapy<br>N=72 (%) | No-Adjuvant chemotherapy<br>(Observation)<br>N=41 (%) | P-value** |
|-------------------------------------------------------------------------|-------------------|-----------------------------------|-------------------------------------------------------|-----------|
| Age                                                                     | Median (range)    | 67.5 (39-85)                      | 73 (42-88)                                            | -         |
|                                                                         | < 70 years old    | 44 (61.1)                         | 15 (36.6)                                             | 0.01      |
|                                                                         | >70 years old     | 28 (38.9)                         | 26 (63.4)                                             |           |
| Sex                                                                     | Male              | 40 (55.6)                         | 30 (73.2)                                             | 0.06      |
|                                                                         | Female            | 32 (44.4)                         | 11 (26.8)                                             |           |
| ECOG PS                                                                 | 0                 | 65 (90.3)                         | 30 (73.2)                                             | 0.01      |
|                                                                         | 1                 | 7 (9.7)                           | 11 (26.8)                                             |           |
| Primary location                                                        | Right-sided colon | 29 (40.3)                         | 14 (34.1)                                             | 0.76      |
|                                                                         | Left-sided colon  | 42 (58.3)                         | 26 (63.4)                                             |           |

|                      |                    |           |           |      |
|----------------------|--------------------|-----------|-----------|------|
|                      | Rectum             | 1 (1.4)   | 1 (2.5)   |      |
| Pathological T stage | T1-2               | 5 (7)     | 0 (0)     | 0.08 |
|                      | T3-4               | 67 (93)   | 41 (100)  |      |
| Pathological N stage | N0                 | 10 (13.9) | 12 (29.3) | 0.05 |
|                      | N1-2               | 62 (86.1) | 29 (70.7) |      |
| Pathological stage   | Stage II           | 9 (12.5)  | 13 (31.7) | 0.01 |
|                      | Stage III          | 63 (87.5) | 28 (68.3) |      |
| RAS/BRAF status      | RAS/BRAF wild-type | 35 (49.3) | 21 (51.2) | 0.23 |
|                      | RAS mutant         | 35 (49.3) | 17 (41.5) |      |
|                      | BRAF mutant        | 1 (1.4)   | 3 (7.3)   |      |
| MSI status           | MSI-High           | 2 (2.8)   | 2 (4.9)   | 0.57 |
|                      | MSS                | 69 (97.2) | 39 (95.1) |      |

\*\*The p-values are calculated using the two-sided chi-square test that compares the distribution of the factors between the two columns (ACT vs Observation) with no correction for multiplicity.

**Supplementary Table 3. Clearance Cohort: Baseline characteristics of patients with post-surgical ctDNA positive result (4-week) who either received or did not receive adjuvant chemotherapy**

| Patient Characteristics |                   | Adjuvant chemotherapy<br>N=92 (50.5%) | No adjuvant chemotherapy<br>(observation)<br>N=90 (49.5%) | P-value* |
|-------------------------|-------------------|---------------------------------------|-----------------------------------------------------------|----------|
| Age                     | Median (range)    | 67 (39-85)                            | 68 (42-88)                                                | -        |
|                         | ≤ 70              | 60 (65.2)                             | 51 (56.7)                                                 | 0.23     |
|                         | >70 years old     | 32 (34.8)                             | 39 (43.3)                                                 |          |
| Sex                     | Male              | 49 (53.2)                             | 65 (72.2)                                                 | 0.008    |
|                         | Female            | 43 (46.8)                             | 25 (27.8)                                                 |          |
| ECOG PS                 | 0                 | 85 (92.4)                             | 75 (83.3)                                                 | 0.06     |
|                         | 1                 | 7 (7.6)                               | 15 (16.7)                                                 |          |
| Primary location        | Right-sided colon | 33 (35.8)                             | 19 (21.6)                                                 | 0.001    |
|                         | Left-sided colon  | 56 (61.0)                             | 53 (60.2)                                                 |          |
|                         | Rectum            | 3 (3.2)                               | 16 (18.2)                                                 |          |
| Pathological T stage    | T1-2              | 5 (6.0)                               | 1 (2.0)                                                   | 0.26     |
|                         | T3-4              | 78 (94.0)                             | 51 (98.0)                                                 |          |
| Pathological N stage    | N0                | 14 (16.8)                             | 16 (30.8)                                                 | 0.058    |
|                         | N1-2              | 69 (83.2)                             | 36 (69.2)                                                 |          |
| Pathological stage      | Stage I           | 0 (0)                                 | 1 (1.1)                                                   |          |

|                 |                        |           |           |        |
|-----------------|------------------------|-----------|-----------|--------|
|                 | Stage II               | 9 (9.8)   | 14 (15.6) | <0.001 |
|                 | Stage III              | 63 (68.5) | 27 (30.0) |        |
|                 | Stage IV or recurrence | 20 (21.7) | 48 (53.3) |        |
| RAS/BRAF status | RAS/BRAF wild-type     | 46 (50.6) | 46 (51.7) | 0.65   |
|                 | RAS mutant             | 43 (47.2) | 39 (43.8) |        |
|                 | BRAF mutant            | 2 (2.2)   | 4 (4.5)   |        |
| MSI status      | MSI-High               | 2 (2.2)   | 3 (3.4)   | 0.63   |
|                 | MSS                    | 89 (97.8) | 86 (96.6) |        |

\*\*The p-values are calculated using the two-sided chi-square test that compares the distribution of the factors between the two columns (ACT vs Observation) with no correction for multiplicity.
